# Supplementary material for: Impact of high conductivity on particle transport to liquid droplets for liquid marble formation
Source: Royal Society of Chemistry journal article supplement (doi:10.1039/d3lf00182b), 2023-12-11
Supplement: d3lf00182b1.pdf [file d3lf00182b1.pdf]

## Supplementary Information

### Impact of high conductivity on particle transport to liquid droplets for liquid marble formation

Casey A. Thomas<sup>1,2,3</sup>, Benjamin T. Lobel<sup>2,4</sup>, Peter M. Ireland<sup>2,3</sup>, Erica J. Wanless<sup>2,3</sup>, Olivier J. Cayre<sup>4</sup>,  
Grant B. Webber<sup>2,3</sup>

<sup>1</sup> Department of Chemical Engineering, University of Melbourne, Parkville, VIC 3010, Australia

<sup>2</sup> College of Engineering, Science and Environment, University of Newcastle, Callaghan, NSW 2308, Australia

<sup>3</sup> Australian Research Council Centre of Excellence for Enabling Eco-Efficient Beneficiation of Minerals

<sup>4</sup> School of Chemical and Process Engineering, University of Leeds, Leeds LS2 9JT, United Kingdom

*Email addresses:* [casey.thomas@unimelb.edu.au](mailto:casey.thomas@unimelb.edu.au) (C.A. Thomas), [b.t.lobel@leeds.ac.uk](mailto:b.t.lobel@leeds.ac.uk) (B.T. Lobel),  
[peter.ireland@newcastle.edu.au](mailto:peter.ireland@newcastle.edu.au) (P.M. Ireland), [erica.wanless@newcastle.edu.au](mailto:erica.wanless@newcastle.edu.au) (E.J. Wanless),  
[o.j.cayre@leeds.ac.uk](mailto:o.j.cayre@leeds.ac.uk) (O.J. Cayre), [grant.webber@newcastle.edu.au](mailto:grant.webber@newcastle.edu.au) (G.B. Webber)

#### Density and mass calculation example for nickel coated particles

*Core PS diameter* = 84  $\mu\text{m}$

$$\text{PS density} = 1.07 \frac{\text{g}}{\text{cm}^3}$$

*Ni layer thickness* = 1.7  $\mu\text{m}$

$$\text{Ni density} = 8.9 \frac{\text{g}}{\text{cm}^3}$$

*PS/Ni particle diameter* = 85.7  $\mu\text{m}$

$$\text{mass of PS core} = \frac{4}{3}\pi \left( \frac{8.4 \times 10^{-5}}{2} \right)^3 \text{m}^3 \times 1070 \frac{\text{kg}}{\text{m}^3} = 0.33 \times 10^{-6} \text{g}$$

$$\text{volume of nickel shell} = \frac{4}{3}\pi \left( \frac{8.57 \times 10^{-5}}{2} \right)^3 - \frac{4}{3}\pi \left( \frac{8.4 \times 10^{-5}}{2} \right)^3 = 1.92 \times 10^{-14} \text{m}^3$$

$$\text{mass of nickel shell} = 1.92 \times 10^{-14} \text{m}^3 \times 8900 \frac{\text{kg}}{\text{m}^3} = 0.18 \times 10^{-6} \text{g}$$

$$\text{total mass of a nickel coated PS particle} = (0.18 + 0.33) \times 10^{-6} = 0.53 \times 10^{-6} \text{g}$$

## Cohesion

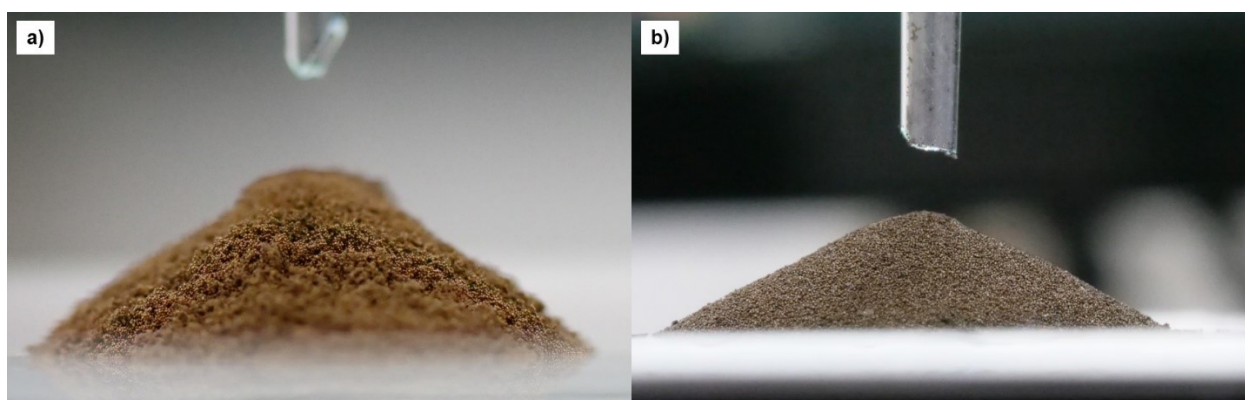

**Figure S1:** Examples of images used to calculate the angle of repose of a) PS/Au and b) PS/Ni.

## Contact angle

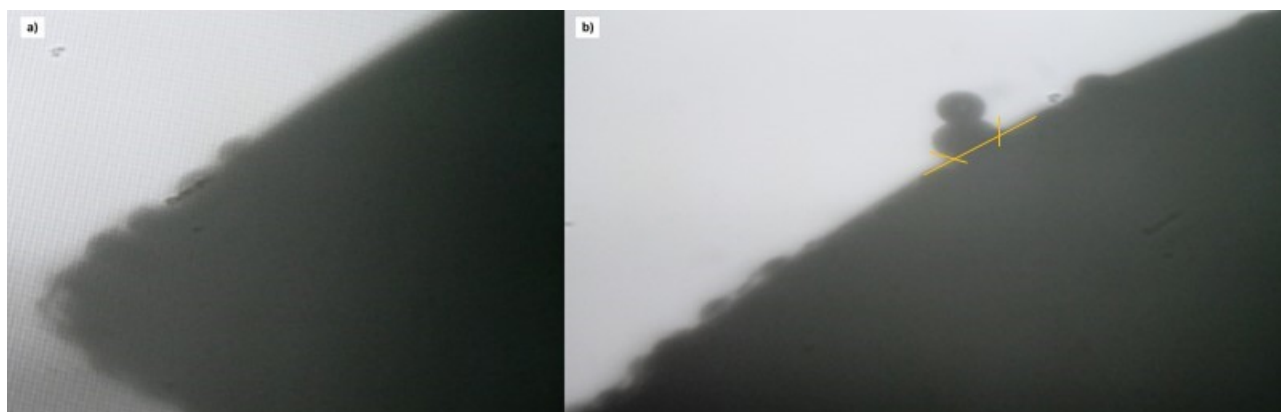

**Figure S2:** Examples of images used to measure contact angle of particles on a sessile water droplet for a) PS/Au and b) PS/Ni.

The contact angle was measured via using a filter on the particles on the sessile droplet interfaces, to increase the contrast between the particles and the droplets. Then, lines were added along the interfaces in Photoshop, and angles measured using the line functionality, provided in Photoshop, an example is added to Figure S2 b).
